# Supplementary material for: Facile hydrothermal growth of VO2 nanowire, nanorod and nanosheet arrays as binder free cathode materials for sodium batteries
Source: Royal Society of Chemistry journal article supplement (doi:10.1039/c5ra25345d), 2016-01-01
Supplement: c5ra25345d1.pdf [file c5ra25345d1.pdf]

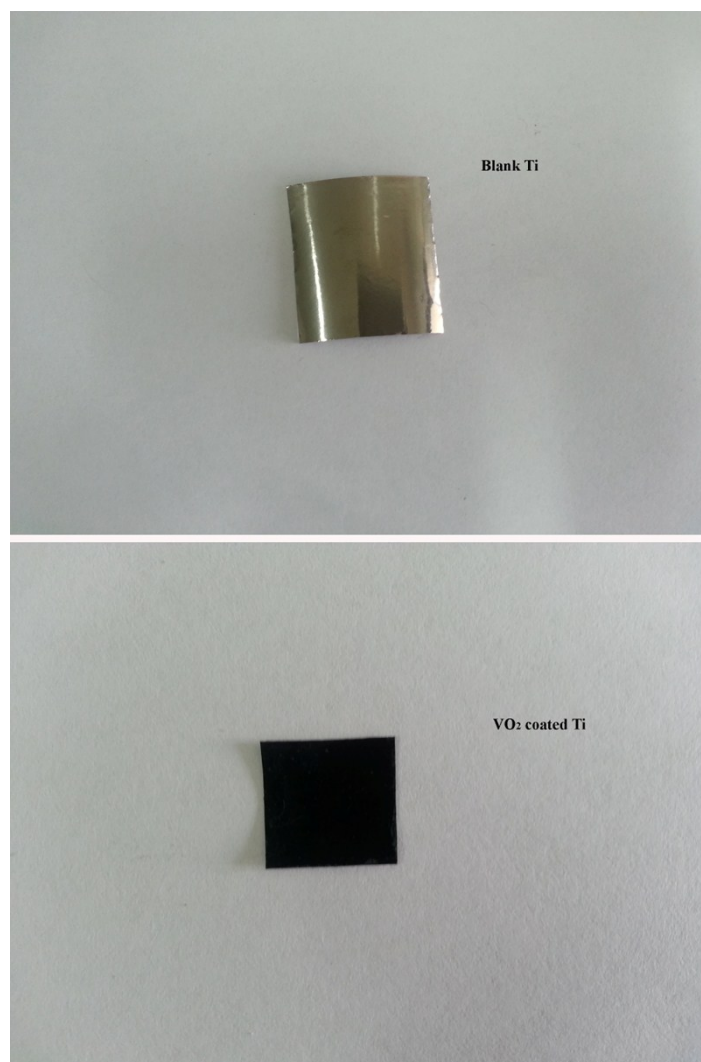

Figure S1 The blank and VO<sub>2</sub> coated Ti foil

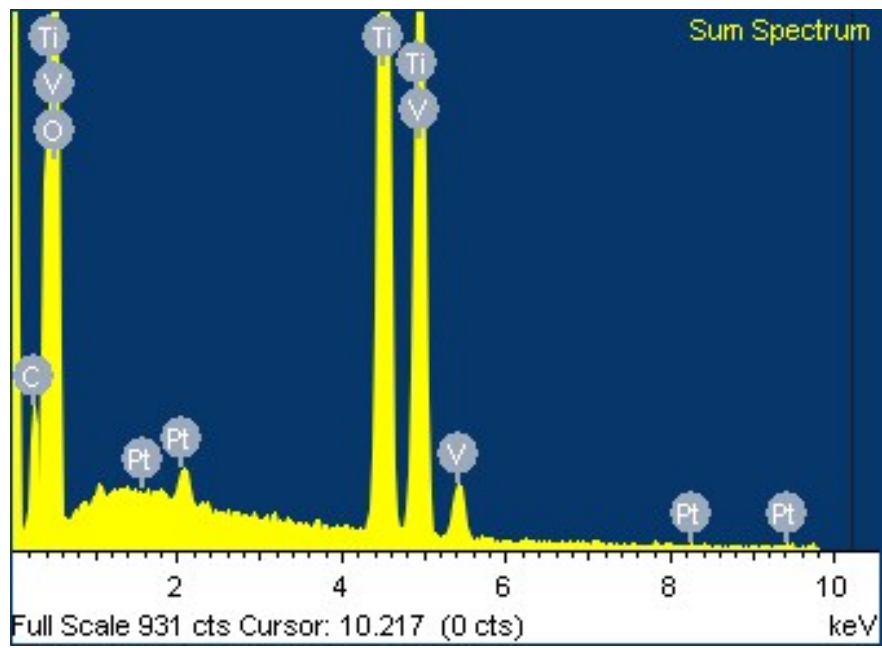

Figure S2 The EDX of the as formed VO<sub>2</sub> coated Ti foil
